# Supplementary material for: Influences of Size-Selective Harvesting on Growth Characteristics and Associated Gene Expression Patterns in Marine Medaka (Oryzias melastigma)
Source: Research Square preprint supplement (doi:10.21203/rs.3.rs-7708251/v1), 2025-10-24
Supplement: Supplementary file 1 [file 686e3a4d42936cac6a14f63b.docx]

**Supplement Table.2** The body weight of the fish used in the experiment (Mean±S.D)

| Harvesting strategy | F1 body length / mm | F2 body length / mm | n |
| --- | --- | --- | --- |
| HB | 22.90 | 24.91 | 9 |
|  | 23.34 | 25.75 | 9 |
|  | 23.80 | 25.48 | 9 |
| MB | 25.36 | 24.93 | 9 |
|  | 25.87 | 25.58 | 9 |
|  | 24.82 | 25.62 | 9 |
| LB | 25.55 | 25.63 | 9 |
|  | 24.34 | 24.79 | 9 |
|  | 25.53 | 24.79 | 9 |
| MS | 26.28 | 29.16 | 9 |
|  | 25.29 | 29.71 | 9 |
|  | 26.58 | 30.50 | 9 |

**Supplement Table.2** The body weight of the fish used in the experiment (Mean±S.D)

| Harvesting strategy | F1 body weight / mm | F2 body weight / mm | n |
| --- | --- | --- | --- |
| HB | 0.2959 | 0.3077 | 9 |
|  | 0.3054 | 0.33 | 9 |
|  | 0.3101 | 0.302 | 9 |
| MB | 0.3459 | 0.4155 | 9 |
|  | 0.3375 | 0.3931 | 9 |
|  | 0.3358 | 0.3812 | 9 |
| LB | 0.3809 | 0.3344 | 9 |
|  | 0.3624 | 0.3547 | 9 |
|  | 0.3379 | 0.3557 | 9 |
| MS | 0.3733 | 0.5032 | 9 |
|  | 0.3752 | 0.58 | 9 |
|  | 0.3342 | 0.5497 | 9 |

**Supplement Table.3** Effects of multi-factor interactions on the body length of marine medaka

| Impact factors | Significance | Degree of freedom | F | Partial η² |
| --- | --- | --- | --- | --- |
| Harvesting | 0.000** | 3 | 47.155 | 0.898 |
| Generation | 0.000** | 1 | 40.42 | 0.716 |
| Harvesting×Generation | 0.000** | 3 | 16.282 | 0.753 |
| **Note: Asterisks (*) and (**) indicate significant differences at *p*<0.05 and *p*<0.01, in bold font respectively.** | | | | |

**Supplement Table.4** Effects of multi-factor interactions on the body weight of marine medaka

| Impact factors | Significance | Degree of freedom | F | Partial η² |
| --- | --- | --- | --- | --- |
| Harvesting | 0.000** | 3 | 53.481042 | 0.9093192 |
| Generation | 0.000** | 1 | 52.167812 | 0.7652851 |
| Harvesting×Generation | 0.000** | 3 | 28.341615 | 0.8416231 |
| **Note: Asterisks (*) and (**) indicate significant differences at *p*<0.05 and *p*<0.01, in bold font respectively.** | | | | |
